# Supplementary material for: Absolute Quantification of Pan-Cancer Plasma Proteomes Reveals Unique Signature in Multiple Myeloma
Source: MDPI journal article supplement (doi:10.3390/cancers15194764), 2023-09-28
Supplement: s1 [file s1]

## Supplementary Figures

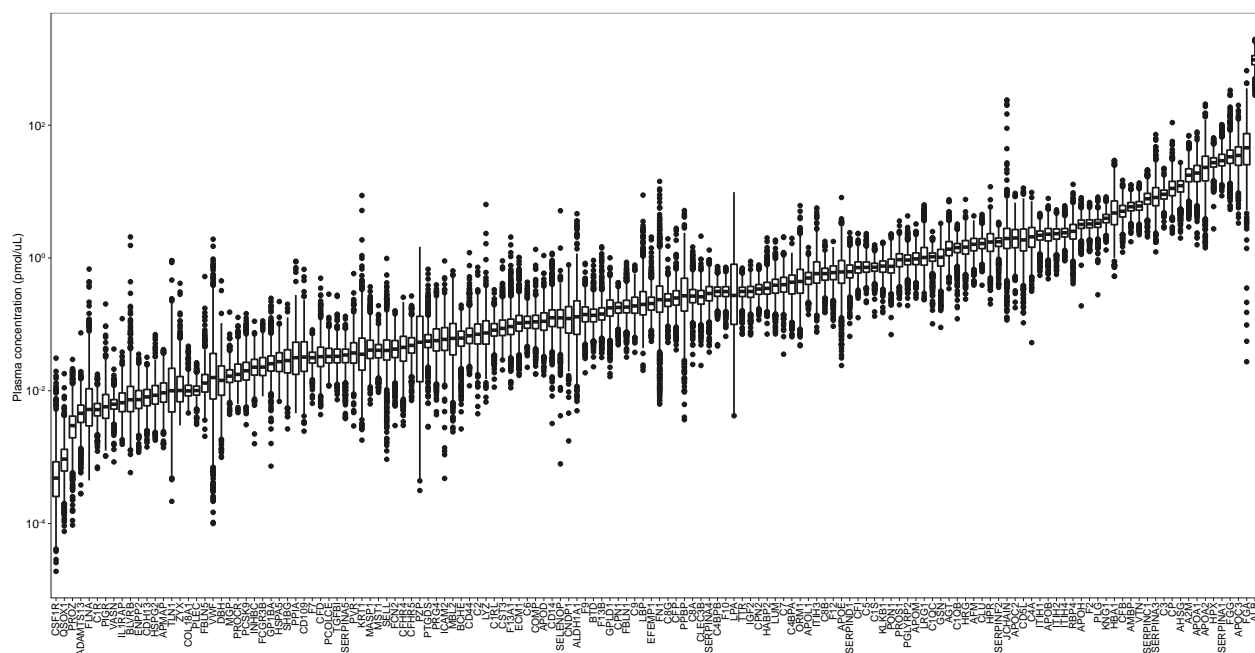

**Figure S1** – All 146 quantified proteins showing dynamic range over 6 orders of magnitude.

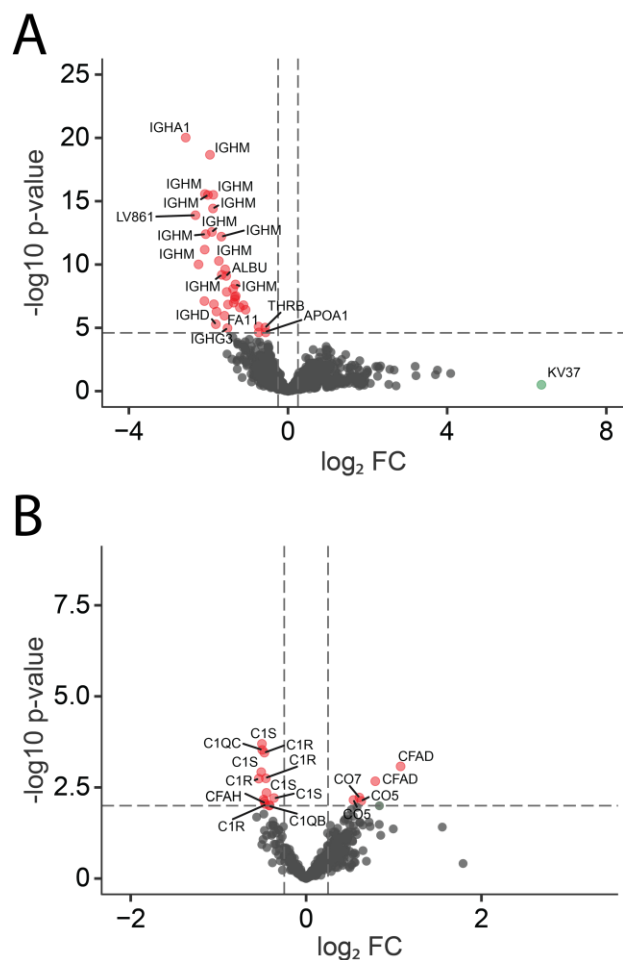

**Figure S2** – Label free quantification data showed protein dysregulation for multiple myeloma compared to all other cancers. A. Confirmed downregulated hallmark proteins for multiple myeloma linked to mainly

immunoglobulins. B. Complement complex C1 proteins were observed downregulated in label free data, though, less significantly than in absolute quantification data.

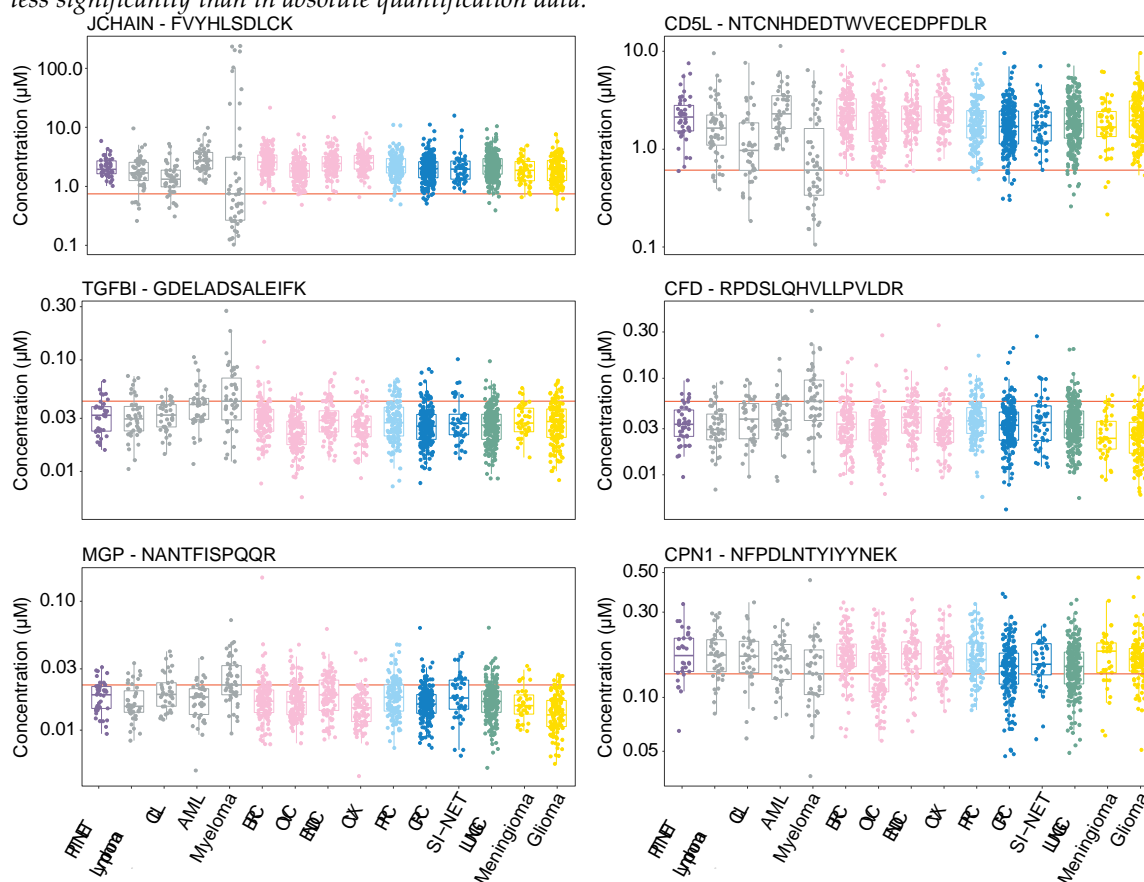

**Figure S3** – Peptides identified as the most important by the random forest models for the classification of multiple myeloma

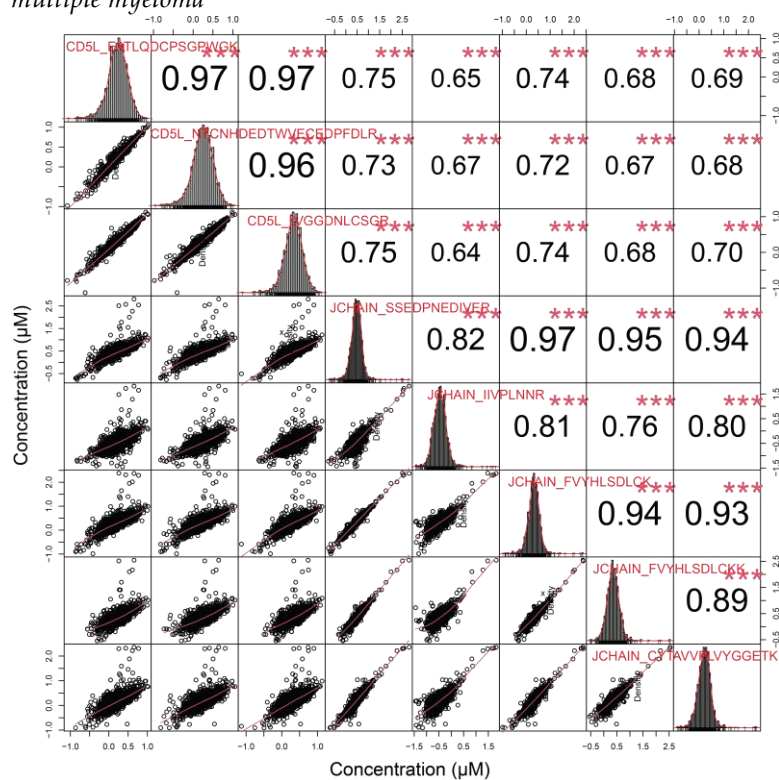

**Figure S4** – Correlation plot between all quantified peptides from CD5L and JCHAIN.
